# Supplementary material
Source: PubMed Central journal article supplement (PMC4232465)
Supplement: NIHMS619962-supplement-01.pdf [file NIHMS619962-supplement-01.pdf]

**Supplemental Figure 1 Legend.**

**Downregulation of select neurotrophins, neurotrophin receptors, and AD-related genes in young-middle aged Ts65Dn CA1 pyramidal neurons.** Bar graphs and color coded heatmaps, in magenta-green scale illustrating relative transcript levels in Ts65Dn (n = 9) and 2N (n = 7) mice at 4-9 months of age in CA1 neurons. **(A)** Several neurotrophins and cognate neurotrophin receptors displayed downregulation, including CNTF, NTF4/5, p75<sup>NTR</sup>, TrkA, TrkB, and TrkC, no changes were seen in NGF $\beta$ , NTF3, or BDNF (microarray targeting exon VIII) **(B)** No significant changes in GluR subunits were observed. **(C)** Alterations in AD-related transcripts included SAA4, KCNIP3, MAPT4, and NPC2 (\*p < 0.01), (\*\*p < 0.005), and (\*\*\*) p < 0.001 (t= trend 0.02 < p < 0.05). Error bars indicate standard error of the mean (SEM).

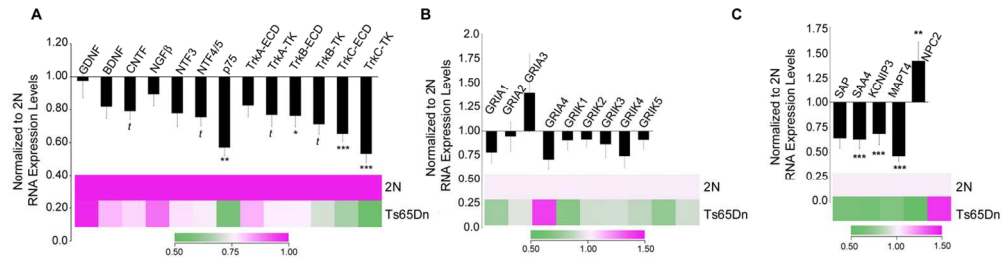

Supplementary Figure 1  
127x34mm (300 x 300 DPI)
